# Supplementary material
Source: PubMed Central journal article supplement (PMC10591948)
Supplement: NIHMS1930472-supplement-Supplemental_Publication_Material.pdf [file NIHMS1930472-supplement-Supplemental_Publication_Material.pdf]

## Supplemental Material

Video 1. Representative video of a normal left atrium from a young mouse.

Video 2. Representative image of a dysfunctional left atrium from an AngII mouse.
